# Supplementary material
Source: Research Square preprint supplement (doi:10.21203/rs.3.rs-9281210/v1)
Supplement: Supplementary file 1 [file 157f5f901b48bb59a4ca00eb.docx]

**English version questionnaire and consent form**

**Research project: Seizure control and adherence to antiseizure medications among epileptic patients in Adidis Ababa Hospitals, Addis Ababa, Ethiopia**

**Name of principal investigator: Betsadkan Kebede**

This information sheet and consent form is prepared by the investigator whose main aim is to studySeizure control and adherence to antiseizure medications among epileptic patients in Addis Ababa, Ethiopia. The investigation is are prepared by the investigator, whose main aim is to study Seizure control and adherence to antiseizure medications among epileptic patients in Addis Ababa, Ethiopia. The investigator is an MPH student from the Addis Continental Institute of Public Health. This letter asks for consent from you to participate in this research. This study aims to assess the association between seizure control and adherence to antiseizure medications. This will be a critical input for policymakers and institutions involved in treating and supporting Epileptic patients. Your participation in this research is voluntary. If you decide not to participate, you will have no negative consequences. Your participation in this study is very important for the achievement of the study and for paving the way for the integration of adherence and belief assessment tools in epilepsy service. No risk will come to you because you participated in this study. All your responses and results obtained will be kept confidential using a coding system whereby no one will have access to your response. You are not expected to give your name or phone number. Without permission from you and the legal body, any part of this study's individual information will not be disclosed to a third person. You have the full right to refuse and withdraw to participate in this study if you don’t wish. The interview period will take about 30 minutes. If you are willing to participate in this study, you need to understand and sign the agreement form, and then you will be asked to give your responses by the data collectors.

If you have any questions, you can contact the principal investigator at the following address:

Betsadkan Kebede: Tel. +251913 623846

Email address: [betsadkanz@gmail.com](mailto:betsadkanz@gmail.com)

If you agree to participate in this study, I appreciate your truthfulness. After having this consent form read to you, please sign below to show that you are willing to participate (there is no need to write your name).

Are you willing to participate in the interview voluntarily? Yes No

**Questionnaire**

| **Background Information** | | | | | |
| --- | --- | --- | --- | --- | --- |
| Q. No | questions | Response | | | Remark |
| 1 | What is your age, in complete years? | |___|___| in complete years | | |  |
| 2 | What is the sex of the participants? | 1.Female  2.Male | | |  |
| 3 | Marital status | 1.Single  2. Married  3. Divorced  4. Widowed  5. Separated | | |  |
| 4 | What is your highest level of education? | 1. Unable to read and write  2. Only read and write  3. 1-4 grade  4. 5-8 grade  5. 9-12 grade  6. College and above | | |  |
| 5 | Where is your residence located relative to this hospital? | 1. Close to the hospital (one-way travel within 30 minutes)  2. Far from the hospital (one-way travel within one hour)  3. Very far from the hospital (one-way travel more than one hour)  4. Outside Addis | | |  |
| 6 | What is your current employment status? | 1. Employed full-time  2. Employed part-time  3. Self-employed  4. Unemployed (seeking work)  5. Unemployed (not seeking work)  6. Student  7. Retired  8. Unable to work (due to disability or other reasons) | | |  |
| **Social drug use** | | | | | |
| 10 | In the last 12 months, did you consume alcoholic drinks? | 1.Never consumed  2.No, not in the last 12 months  3.Yes, at least once a month  4.Yes, at least once a week  5.Yes, more than two days per week | | |  |
| 11 | In the last 12 months, did you consume khat? | 1.Never consumed  2.No, not in the last 12 months  3.Yes, at least once a month  4.Yes, at least once a week  5.Yes, more than two days per week | | |  |
| 13 | In the last 12 months, did you smoke cigarettes? | 1.Never consumed  2.No, not in the last 12 months  3.Yes, at least once a month  4.Yes, at least once a week  5.Yes, more than two days per week | | |  |
| **Clinical** | | | | | |
| 20 | For how long have you had epilepsy? | |___|___| in complete years | | |  |
| 21 | At what age did you first had a seizure attack? | |___|___| in complete years | | |  |
| 22 | For how long did you take Antiseizure medications? | ___|___| in complete years  0 for a duration less than 1 year. | | |  |
| 23 | On average, how many Seizure attacks in a year did you experience before starting antiepileptic medications? | |___|___| average number of seizures per year | | |  |
| 24 | Have you had a Seizure attack in the past 12 months | 1= No  2= Yes | | | No= skip to question #28 |
| 25 | If yes to Q24, the Number of Seizure attacks in the past 12 months | |___|___| number of seizure attacks | | |  |
| 26 | If yes to q24, Have you had a seizure attack in the past 4 weeks | 1= No  2= Yes | | |  |
| 27 | If yes to Q26, how many Seizure attacks did you experience in the past 4 weeks? | |___|___| number of seizure attacks | | |  |
|  | History of Comorbidities |  | | |  |
| 28 | Have you ever been diagnosed with Diabetes mellitus? | 1= No  2= Yes | | |  |
| 28 | Have you ever been diagnosed with hypertension? | 1= No  2= Yes | | |  |
| 29 | Have you ever been diagnosed with HIV/AIDS? | 1= No  2= Yes | | |  |
| 30 | Have you ever been diagnosed with mental health disorders? | 1= No  2= Yes | | |  |
| 31 | Have you ever been diagnosed with a stroke? | 1= No  2= Yes | | |  |
| 32 | Have you ever been diagnosed with migraine headaches? | 1= No  2= Yes | | |  |
| 33 | Have you ever been diagnosed with hemorrhoids? | 1= No  2= Yes | | |  |
| 34 | How many antiseizure medications do you currently take? | 1.Monotherapy  2. Polytherapy | | |  |
| 29 | How frequently do you have Follow-up for the seizure disorder (appointment interval)? | |___|___| in complete months | | |  |
| 30 | Do you regularly attend the Follow-up appointments? | 1No  2.Yes | | |  |
| 31 | Have you experienced any adverse effects related to antiseizure drug use? | 1.No  2. Yes | | |  |
|  |  |  | | |  |
| **BMQ scale items: for the following statements, respond “agree/strongly agree” if you think the statement is correct and “disagree/strongly disagree” if the statement is incorrect. If you are not sure, answer “uncertain”.** | | | | | |
| Necessity | | | | | |
| 50 | My health, at present, depends on my antiseizure medicine | 1.Strongly agree  2. Agree  3. Uncertain  4. Disagree  5. Strongly disagree | | |  |
| 51 | My life would be impossible without my antiseizure medicine | 1.Strongly agree  2. Agree  3. Uncertain  4. Disagree  5. Strongly disagree | | |  |
| 52 | Without my antiseizure medicine, I would be very ill | 1. Strongly agree  2. Agree  3. Uncertain  4. Disagree  5. Strongly disagree | | |  |
| 53 | My health in the future will depend on my antiseizure medicine | 1. Strongly agree  2. Agree  3. Uncertain  4. Disagree  5. Strongly disagree | | |  |
| 54 | My antiseizure medicine protects me from becoming worse | 1. Strongly agree  2. Agree  3. Uncertain  4. Disagree  5. Strongly disagree | | |  |
| Concern | | | | | |
| 55 | Having to take antiseizure medicine worries me | 1. Strongly agree  2. Agree  3. Uncertain  4. Disagree  5. Strongly disagree | | |  |
| 56 | I sometimes worry about the long-term effects of my antiseizure medicine | 1. Strongly agree  2. Agree  3. Uncertain  4. Disagree  5. Strongly disagree | | |  |
| 57 | My antiseizure medicine is a mystery to me | 1. Strongly agree  2. Agree  3. Uncertain  4. Disagree  5. Strongly disagree | | |  |
| 58 | My antiseizure medicine disrupts my life | 1. Strongly agree  2. Agree  3. Uncertain  4. Disagree  5. Strongly disagree | | |  |
| 59 | I sometimes worry about becoming too dependent on my antiseizure medicine | 1. Strongly agree  2. Agree  3. Uncertain  4. Disagree  5. Strongly disagree | | |  |
| Overuse | | | | | |
| 60 | Doctors use too many antiseizure medicines | | 1. Strongly agree  2. Agree  3. Uncertain  4. Disagree  5. Strongly disagree | | |  |
| 61 | Natural remedies are safer than antiseizure medicines | | 1. Strongly agree  2. Agree  3. Uncertain  4. Disagree  5. Strongly disagree | | |  |
| 62 | Doctors place too much trust in antiseizure medicines | | 1. Strongly agree  2. Agree  3. Uncertain  4. Disagree  5. Strongly disagree | | |  |
| 63 | If doctors had more time with patients, they would prescribe fewer antiseizure medicines | | 1. Strongly agree  2. Agree  3. Uncertain  4. Disagree  5. Strongly disagree | | |  |
| 64 | If doctors had more time with patients, they would prescribe fewer antiseizure medicines | | 1. Strongly agree  2. Agree  3. Uncertain  4. Disagree  5. Strongly disagree | | |  |
| -Harm | | | | | |  |
| 65 | People who take antiseizure medicines should stop their treatment for a while every  now and again | | 1. Strongly agree  2. Agree  3. Uncertain  4. Disagree  5. Strongly disagree | | |  |
| 66 | Most antiseizure medicines are addictive | | 1. Strongly agree  2. Agree  3. Uncertain  4. Disagree  5. Strongly disagree | | |  |
| 67 | Antiseizure Medicines do more harm than good | | 1. Strongly agree  2. Agree  3. Uncertain  4. Disagree  5. Strongly disagree | | |  |
| 68 | All antiseizure medicines are poisons | | 1. Strongly agree  2. Agree  3. Uncertain  4. Disagree  5. Strongly disagree | | |  |
| Antiepileptic medication drug adherence | | | | | |
| 100 | Have you **ever** forgotten to take your medication? | | | 1. Yes  2.NO | |  |
| 101 | Have you forgotten to take your antiseizure medication **in the last 12 months**? | | | 1.Yes  2.No | |  |
| 102 | Have you forgotten to take your antiseizure medication **in the last 4 weeks**? | | | 1.Yes  2.No | |  |
| 103 | Are you careless at times about taking your medication? | | | 1. Yes  2.NO | |  |
| 104 | When you feel better, do you sometimes stop taking your medication? | | | 1.yes  2.NO | |  |
| 105 | Sometimes if you feel worse when you take the medication, do you stop taking it? | | | 1.yes  2.NO | |  |
| 106 | I take my medication only when I am sick | | | 1.yes  2.NO | |  |
| 107 | It is unnatural for my mind and body to be controlled by medication | | | 1.yes  2.NO | |  |
| 108 | My thoughts are clearer on medication | | | 1.yes  2.NO | |  |
| 109 | By staying on medication, I can prevent getting sick. | | | 1.yes  2.NO | |  |
| 110 | I feel weird, like a ‘zombie’ on medication | | | 1.yes  2.NO | |  |
| 111 | Medication makes me feel tired and sluggish | | | 1.yes  2.NO | |  |

**Study participant's referral slip**

| 1 | Patent name |  |
| --- | --- | --- |
| 2 | Reported seizure in the last 12 months | |___| Yes  |___| No |
|  | How many? |  |
| 3 | Type of Epilepsy | 1.GTC  2. Focal  3. Absence  4. Others |
| 4 | Medication regimen in the last 12 months (tick all) | 1.PHB  2.PHT  3. CBM  4.VPA  5.OTHERS specify |
| 5 | Current medication, last 4 weeks |  |
| 6 | Frequency of drug intake |  |
