# Supplementary material
Source: Research Square preprint supplement (doi:10.21203/rs.3.rs-9281210/v1)
Supplement: Supplementary file 3 [file c37b0254f1d02d99b279c1ea.docx]

**Table 1:** Sample size determination table

| Factor | CI | Power | Ratio of controls to cases | Percent of control exposed | Odds ratio | Sample of cases | Sample of controls | Total sample size |
| --- | --- | --- | --- | --- | --- | --- | --- | --- |
| **Non-adherence to antiseizure medications** | **95%** | **80%** | **2:1** | **37.2** | **2.4** | **70** | **140** | **210** |

##

Table 2. Sociodemograpic characteristics of study participants

| Variable | Cases (Uncontrolled Seizure) | Controls (Controlled Seizure ) |
| --- | --- | --- |
| Age  20-29  30-39  40-49  50-59  60 and above | 14(20.6%)  14(20.6%)  14(20.6%)  14(20.6%)  12(17.6%) | 28(20.6%)  28(20.6%)  28(20.6%)  28(20.6%  24(17.6%) |
| Sex  Male  Female | 41(60.3%)  27(39.7%) | 84(61.8%)  52(38.2%) |
| Ever Married *  No  Yes | 33(48.5%)  35(51.%) | 59(43.4%)  77(56.6%) |
| Educational level  Unable to read and write  Only read and write  1-4 grade  5-8 grade  9-12 grade  College and above | 2(3%)  5(7.4%)  8 (11.8%)  22(32.1%)  16(23.6%)  15(22.1%) | 5 (3.7%)  9 (6.6%)  20(14.7%)  36(26.5%)  38(27.9%)  28(20.6%) |
| Residence  Close to the hospital  Far from the hospital  Very far from the hospital  Outside Addis | 8 (11.8%)  20(29.4%)  22(32.3%)  18(26.5%) | 24(17.7%)  35(25.7%)  36(26.5%)  41(30.1%) |
| Employment status  Employed full-time  Employed part-time  Self-employed  Unemployed* | 16(23.5%)  3(4.4%)  10(14.7%)  39(57.4%) | 39(28.7%)  10(7.4%)  41(30.1%)  46(33.8%) |

*unemployed= (seeking work and not seeking work),student, retired, unable to work)

*Ever Married=(Married, Divorced, Widowed, Separated)

*Close to the hospital (one-way travel within 30 minutes), Far from the hospital (one-way travel within one hour), Very far from the hospital (one-way travel more than one hour)

Table 3. Social drug use characteristics of study participants

| Variable | Uncontrolled seizure | Controlled Seizure | OR | P-value | 95% CI |
| --- | --- | --- | --- | --- | --- |
| Alcohol  Never consumed  No, not in the last 12 months  Yes, at least once a month  Yes, al least once a week  Yes, more than two days per week | 37(54.4%)  17(25%)  7(10.2%)  4(6.0%)  3(4.4%) | 92(67.7%)  40(29.4%)  3(2.2%)  1 (0.7%)  0(0%) | reference  0.80  9.11  9.94 | 0.874  0.014  0.043 | 0.53-2.09  1.42-23.65  1.07-91.96 |
| Khat  Never consumed  No, not in the last 12 months  Yes, at least once a month  Yes, al least once a week  Yes, more than two days per week | 58(85.3%)  6(8.8%)  2(2.9%)  1(1.5%)  1(1.5%) | 123(90.5%)  11(8.1%)  1(0.7%)  1(0.7%)  0(0%) | reference  1.15  4.24  2.12 | 0.784  0.242  0.597 | 0.40-3.28  0.37-47  0.13-34 |
| Cigarretes  Never consumed  No, not in the last 12 months  Yes, at least once a month  Yes, al least once a week  Yes, more than two days per week | 55(80.9%)  13(19.1%)  0(0%)  0(0%)  0(0%) | 130(95.6%)  5(3.7%)  1(0.7%)  0(0%)  0(0%) | Reference  6.14 | 0.001 | 2.09-18.06 |

Table 4. Clinical characteristics of study participants

| Variable | Cases (uncontrolled seizure) | Controls (controlled seizure ) | 0R | P-value | 95%CI |
| --- | --- | --- | --- | --- | --- |
| Age at 1st seizure  Lessthan 20  Morethan 20 | 24(35.3%)  44(64.7%) | 59(43.4%)  77(56.6%) | 1.40 | 0.268 | 0.76-2.56 |
| Number of seizure episodes before med  Less than 5  More than 5 | 20(29.4%)  48(70.6%) | 62(45.6%)  74(54.4%) | 2.01 | 0.028 | 1.08-3.74 |
| Duration of Epilepsy  Less than10 years  Morethan 10 years | 27(39.7%)  41(60.3%) | 42(30.9%)  94(69.1%) | 0.67 | 0.210 | 0.36-1.24 |
| Duration of medication  Less than10 years  Morethan 10 years | 32(47.1%)  36(52.9%) | 49(36%)  87(64%) | 0.63 | 0.130 | 0.35-1.14 |
| Comorbidity  NO  YES | 40(58.8%)  28(41.2%) | 100(73.5%)  36(26.5%) | 1.94 | 0.034 | 1.05-3.59 |
| Medication regime  Monotherapy  Polytherapy | 24(35.3%)  44(64.7%) | 87(64%)  49(36%) | 3.25 | 0.00 | 1.77-5.98 |
| Appointment interval  One month  Two months  Three mnths  Four months | 16(23.5%)  30(44.1%)  15(22.1%)  7(10.3%) | 32(23.5%)  52(38.2%)  29(21.3%)  23(17%) | referencce  1.15  1.03  0.60 | 0.70  0.93  0.34 | 0.54-2.44  0.43-2.45  0.21-1.71 |
| Regular follow up  NO  YES | 10(14.7%)  58(85.3%) | 3(2.2%)  133(97.8%) | 0.13 | 0.003 | 0.03-0.49 |
| Adverse Effects  NO  YES | 30(44.1%)  38(55.9%) | 97(71.3%)  39(28.7%) | 3.15 | 0.000 | 1.71-5.77 |
| Types of Epilepsy  GTC  Focal  unspecified | 66(97%)  2(3%)  0(0%) | 121(89%)  9(6.6%)  6(4.4%) | 0.40  Empty | 0.260 | 0.08-1.94 |

Table 5. BMQ scale characteristics of study participants

| Variable: | Uncontrolled seizure | Controlled Seizure | 0R | P-value | 95% CI |
| --- | --- | --- | --- | --- | --- |
| Necessity  Above mid point (have belief)  Below mid point (don’t have belief) | 53(78%)  15(22%) | 123(90.4%)  13(9.6%) | 0.37 | 0.017 | 0.16-0.83 |
| Concern  Above mid score (Have belief)  Below mid score (Don’t have belief) | 28(41.2%)  40(58.8%) | 28(20.6%)  108(79.4%) | 2.7 | 0.002 | 1.42-5.10 |
| BMQ overall belief (necessity-concern differential)  Negative  Positive | 24(35.3%)  44(64.7%) | 8(5.9%)  128(94.1%) | 8.72 | 0.00 | 3.65-20.83 |
| Overuse  Above mid point (Have belief)  Below mid point (Don’t have belief) | 27(39.7%)  41(60.3%) | 20(14.7%)  116(85.3%) | 3.81 | 0.00 | 1.93-7.53 |
| Harm  Above mid point  Below mid point | 5(7.4%)  63(92.6%) | 0(0%)  136(100%) |  |  |  |

Table 6. Antiseizure drug adherance (MARS) score characteristics of study participants

| Variable | Cases (Uncontrolled Seizure) | Controls (Controlled Seizure) |
| --- | --- | --- |
| Have you **ever** forgotten to take your medication?  Yes  No | 50 (73.53%)  18 (26.47%) | 66(48.5%)  70(51.5%) |
| Have you forgotten to take your antiseizure medication **in the last 12 months**?  Yes  No | 42 (61.76%)  26(38.24%) | 13(9.55%)  123(90.44%) |
| Have you forgotten to take your antiseizure medication **in the last 4 weeks**?  Yes  No | 20(29.41%)  48(70.59%) | 3(2.20%)  133(97.80%) |
| Are you careless at times about taking your medication?  Yes  No | 13(19.12%)  55(80.88%) | 2 (1.47%)  134 (98.53%) |
| When you feel better, do you sometimes stop taking your medication?  Yes  No | 18 (26.47%)  50 (73.53%) | 1 (0.74%)  135 (99.26%) |
| Sometimes if you feel worse when you take the medication, do you stop taking it?  Yes  No | 14(20.59%)  54(79.41%) | 2(1.47%)  134(98.53%) |
| I take my medication only when I am sick  Yes  No | 1 (1.47%)  67 (98.53%) | 1 (0.74%)  135 (99.26) |
| It is unnatural for my mind and body to be controlled by medication  Yes  No | 21(30.9%)  47(69.1%) | 24(17.7%)  112(82.3%) |
| My thoughts are clearer on medication  Yes  No | 30(44.1%)  38(55.9%) | 62(45.6%)  74(54.4%) |
| By staying on medication, I can prevent getting sick.  Yes  No | 65(95.6%)  3(4.4%) | 129(94.9%)  7(5.1%) |
| I feel weird, like a ‘zombie’ on medication  Yes  No | 13(19.1%)  55(80.9%) | 10(7.4%)  126(92.6%) |
| Medication makes me feel tired and sluggish  Yes  No | 43(63.2%)  25(36.7%) | 43(31.6%)  93(68.4%) |

| Variable | Obs | Mean | Std. Dev. | Min | Max |
| --- | --- | --- | --- | --- | --- |
| Medication adherence | 204 | 7.82 | 1.71 | 1 | 10 |

| Variable | Cases (Uncontrolled seizure) | Controls (Controlled Seizure) | 0R | P-value | 95% CI |
| --- | --- | --- | --- | --- | --- |
| NonAdherant  Adherant | 22(32.4%)  46(67.6%) | 7(5.2%)  129(94.8%) | 8.81 | 0.000 | 3.53-21.99 |

Table 7. Medication regimen in the last 12 months

| Medication regimen | Cases(uncontrolled seizure ) | Controls (controlled seizure ) | Total |
| --- | --- | --- | --- |
| PHB | 7 | 44 | 51 |
| PHT | 1 | 7 | 8 |
| CBM | 7 | 11 | 18 |
| VPA | 12 | 24 | 36 |
| OTHERS | 1 | 3 | 4 |
| PHB + PHT | 4 | 5 | 9 |
| PHB + CBM | 7 | 14 | 21 |
| PHB + VPA | 16 | 22 | 38 |
| PHT + CBM | 1 | 2 | 3 |
| PHT+VPA | 4 | 3 | 7 |
| PHB+PHT+CBM | 2 | 1 | 3 |
| PHB+PHT+VPA | 5 | 0 | 5 |
| PHT+CBM+VPA | 1 | 0 | 1 |

PHB-Phenobarbitone, PHT- Phenytoin, VPA- Sodium valproate, CBM- Carbamazepine, others- lamotrigine, Levetiracetam

Table 8. Factor associated with uncontrolled seizure and ASM adherence in a multivariate logistic regression model

| **Variable** | **Cases (Uncontrolled**  **Seizure)** | **Controls (Controlled**  **Seizure)** | **COR (95% CI)** | **P value** | **AOR (95% CI)** | **P value** |
| --- | --- | --- | --- | --- | --- | --- |
| **ASM adherence**  NonAdherent  Adherent | 22  46 | 7  129 | 8.81(3.53-21.99) | 0.000 | 4.67 (1.42-15.36)* | 0.011 |
| **Alcohol**  Never consumed  No, not in the last 12 months  Yes, at least once a month  Yes, at least once a week  Yes, Morethan 2 days per week | 37  17  7  4  3 | 92  40  3  1  0 | 1.05 (0.53-2.09)  5.80(1.42-23.65)  9.94 (1.07-91.9) | 0.874  0.014  0.043 | 0.63(0.23-1.66)  2.2 (0.31-15.5)  2.4(0.10-58.9) | 0.35  0.42  0.57 |
| **Cigarretes**  Never consumed  No, not in the last 12 months  Yes, at least once a month | 55  13  0 | 130  5  1 | 6.14(2.09-18.06) | 0.001 | 7.63(1.73-33)* | 0.007 |
| **Number of seizure before med**  Less than 5 seizure episodes  More than 5 seizure episodes | 24  44 | 59  77 | 2.01(1.08-3.74) | 0.028 | 1.26(0.55-2.85) | 0.57 |
| **Comorbidity**  NO  YES | 40  28 | 100  36 | 1.94(1.05-3.59) | 0.034 | 1.14(0.50-2.60) | 0.75 |
| **Medication regime**  Monotherapy  Polytherapy | 24  44 | 87  49 | 3.25(1.77-5.98) | 0.00 | 3.07(1.36-6.94)* | 0.007 |
| **Regular follow up**  NO  YES | 10  58 | 3  133 | 0.13(0.03-0.49) | 0.003 | 0.26(0.049-1.43) | 0.12 |
| **Adverse Effects**  NO  YES | 30  38 | 97  39 | 3.15(1.71-5.77) | 0.00 | 1.2 (0.50-2.83) | 0.67 |
| **Necessity Belief**  Have belief  Don’t have belief | 53  15 | 123  13 | 0.37(0.16-0.83) | 0.017 | 0.87(0.24-3.1) | 0.83 |
| **Concern Belief**  Have belief  Don’t have belief | 28  40 | 28  108 | 2.7(1.42-5.10) | 0.002 | 0.69(0.24-1.96) | 0.49 |
| **Overuse Belief**  Have belief  Don’t have belief | 27  41 | 20  116 | 3.82(1.93-7.53) | 0.00 | 1.49(0.57-3.93) | 0.41 |
| **BMQ-over all Belief**  Negative  Positive | 24  44 | 8  128 | 8.72(3.65-20.83) | 0.000 | 7.75(1.9-30.82)* | 0.004 |

*p < 0.05
